# Supplementary material
Source: publisher site journal article supplement (https://www.dovepress.com/article/519742)
Supplement: Supplementary file 1 [file 2025-3-23+Supplementary+Material_1_2.docx]

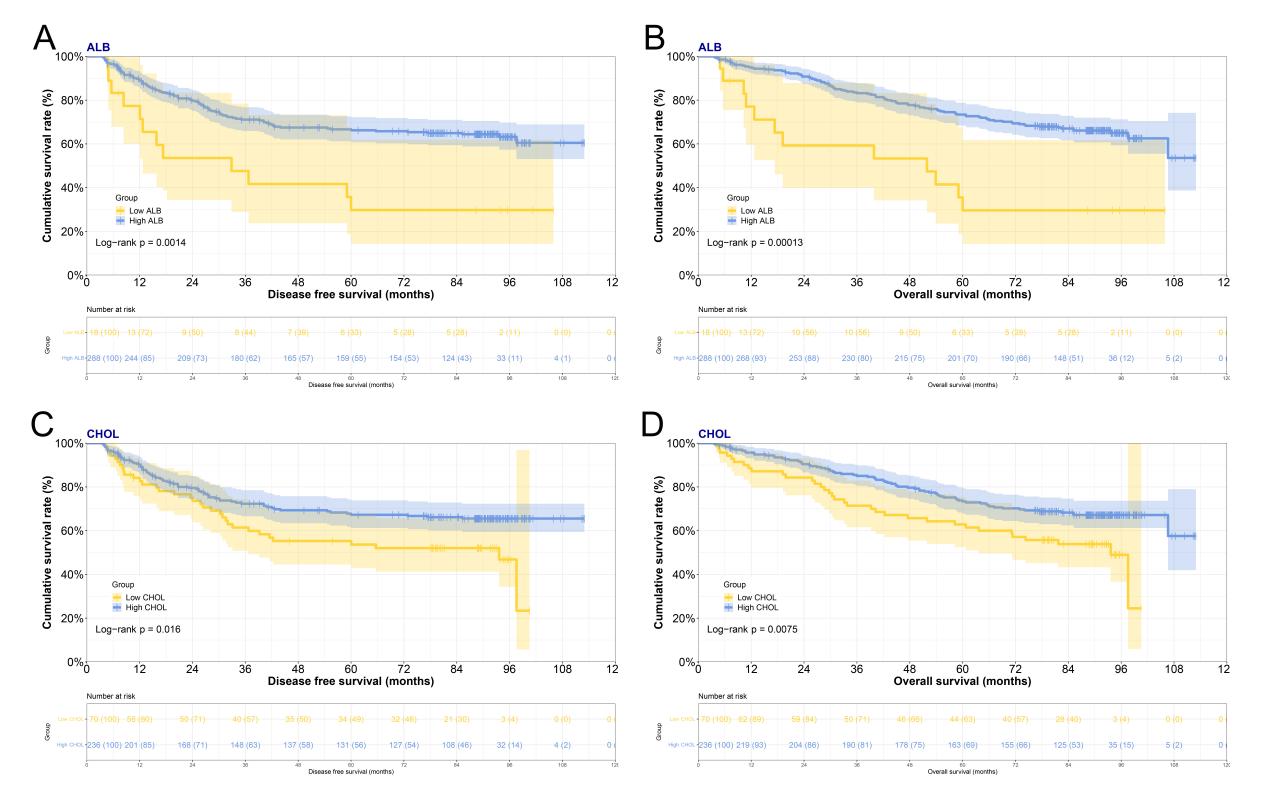


**Figure S1** Kaplan-Meier survival analysis according to serum albumin level (ALB) / total cholesterol (CHOL) and group. (A) Significant differences in the disease free survival among stage III breast cancer patients were found with two groups by ALB (P=0.0014). (B) Significant differences in the overall survival among stage III breast cancer patients were found with two groups by ALB (P=0.0001). (C) Significant differences in the disease free survival among stage III breast cancer patients were found with two groups by CHOL (P=0.0158). (D) Significant differences in the overall survival among stage III breast cancer patients were found with two groups by CHOL (P=0.0075).


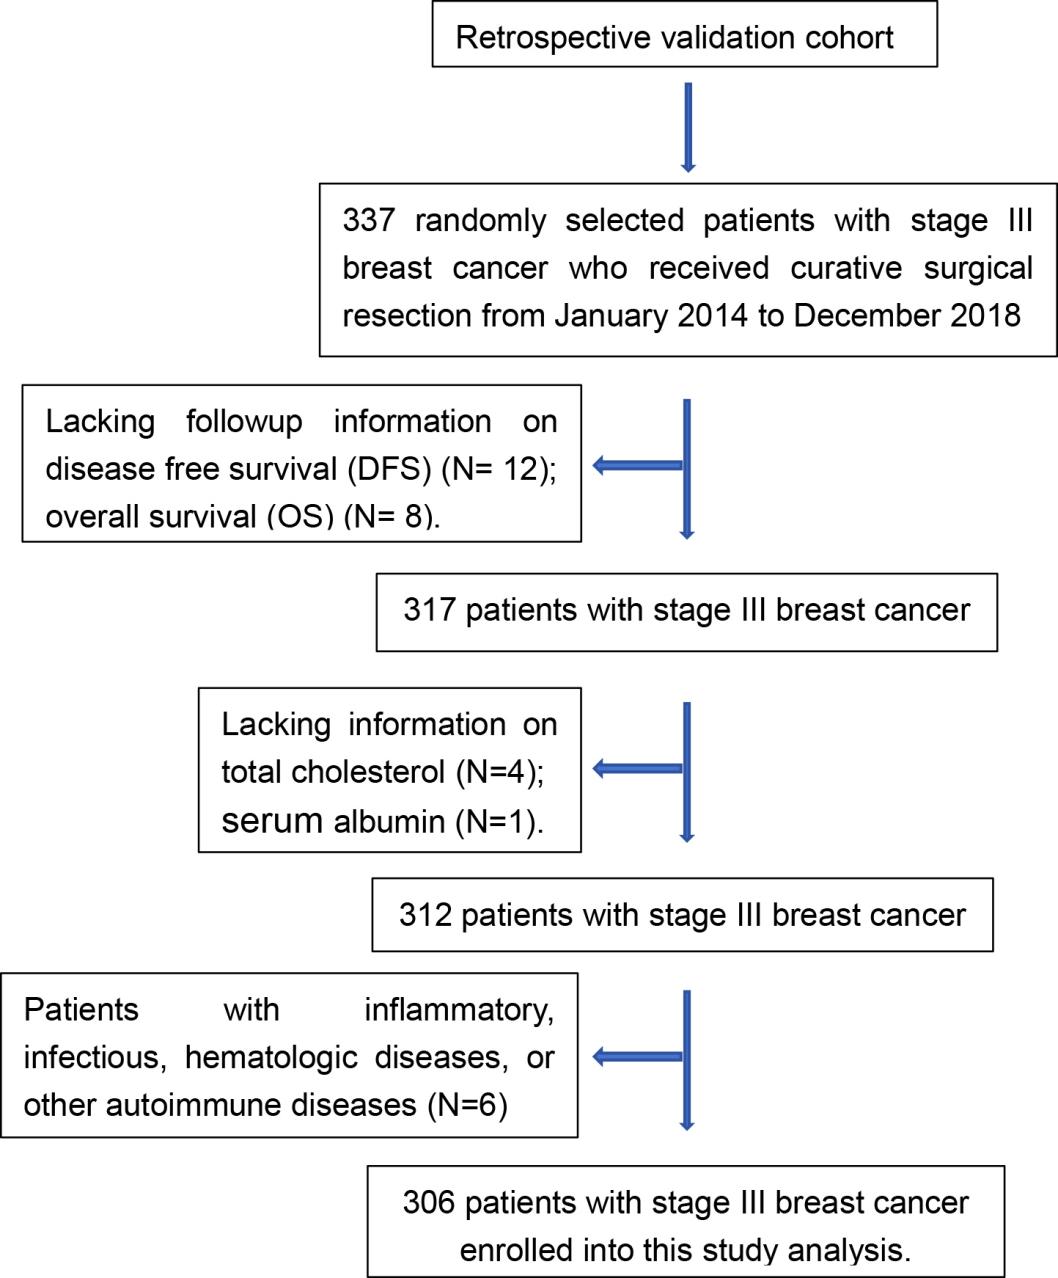


**Figure S2** Flowchart for identifying the current study population.


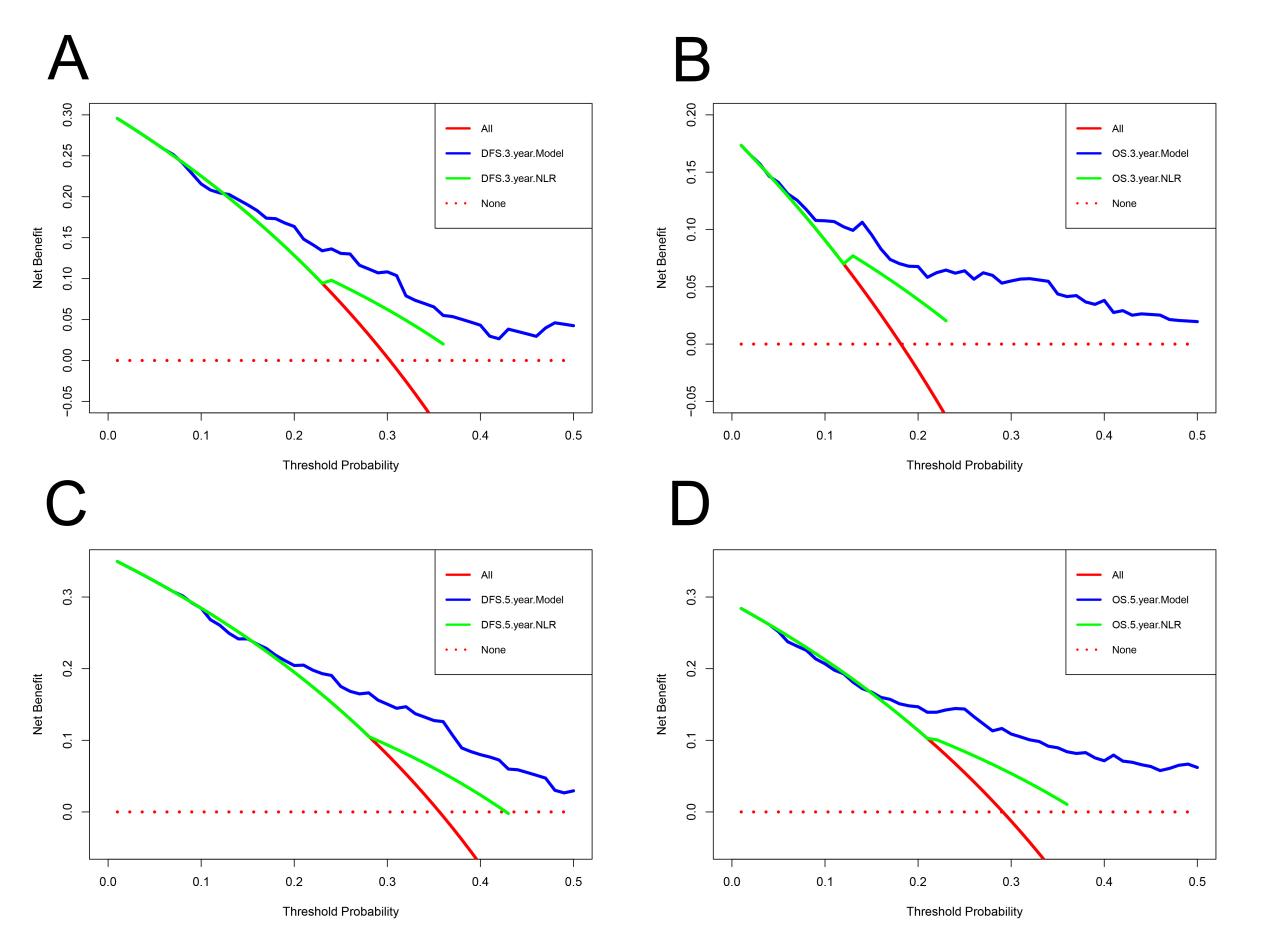


**Figure S3** Decision curve analysis (DCA) curves for evaluating clinical usefulness of the condition survival Nomogram prognostic model and NLR for 3- and 5- year disease free survival (DFS) and overall survival (OS) rates. (A) DCA curves for evaluating clinical usefulness of the condition survival Nomogram prognostic model and NLR for 3- year DFS rate. (B) DCA curves for evaluating clinical usefulness of the condition survival Nomogram prognostic model and NLR for 3- year OS rate. (C) DCA curves for evaluating clinical usefulness of the condition survival Nomogram prognostic model and NLR for 5- year DFS rate. (D) DCA curves for evaluating clinical usefulness of the condition survival Nomogram prognostic model and NLR for 5- year OS rate.


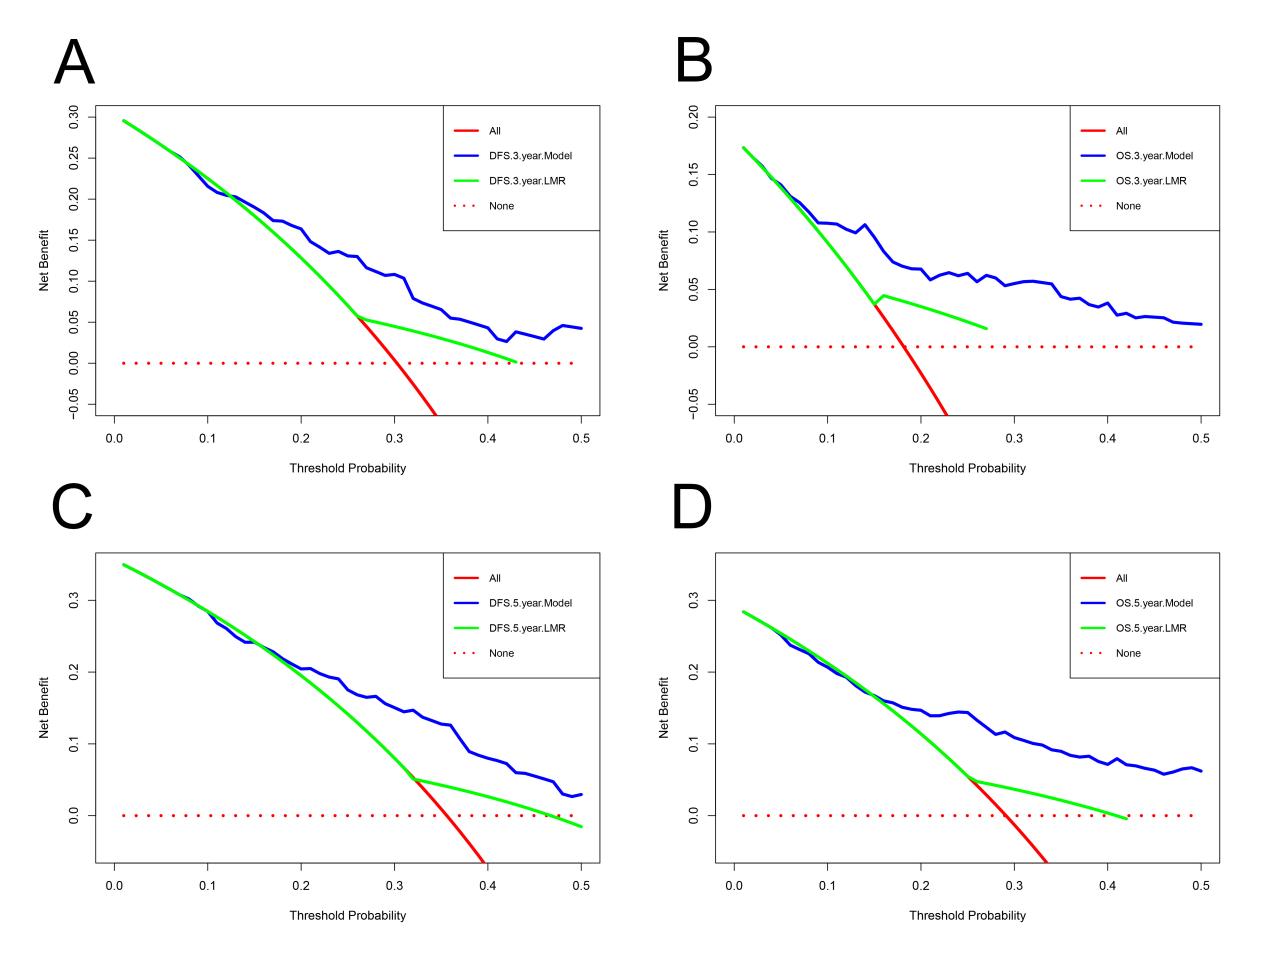


**Figure S4** Decision curve analysis (DCA) curves for evaluating clinical usefulness of the condition survival Nomogram prognostic model and LMR for 3- and 5- year disease free survival (DFS) and overall survival (OS) rates. (A) DCA curves for evaluating clinical usefulness of the condition survival Nomogram prognostic model and LMR for 3- year DFS rate. (B) DCA curves for evaluating clinical usefulness of the condition survival Nomogram prognostic model and LMR for 3- year OS rate. (C) DCA curves for evaluating clinical usefulness of the condition survival Nomogram prognostic model and LMR for 5- year DFS rate. (D) DCA curves for evaluating clinical usefulness of the condition survival Nomogram prognostic model and LMR for 5- year OS rate.
